# Supplementary material for: Identification of a novel PPARβ/δ/miR‐21‐3p axis in UV‐induced skin inflammation
Source: PubMed Central journal article supplement (PMC4967944; doi:10.15252/emmm.201505384), 2016-06-01
Supplement: EMMM-8-919-s001.pdf [file EMMM-8-919-s001.pdf]

**Appendix table of content:**

**Appendix Table S1**

**Appendix Table S2**

**Appendix Figure S1**

**Appendix Figure S2**

**Appendix Methods**

**Appendix Legends**

## Appendix Methods

**miR-21-3p putative targets in silico analysis:** Predictions of seed sequences were obtained from miRmap (Vejnar et al, 2013). Genomic distances of the first nucleotide of SMAD7 seed sequence predicted to bind with miR-21-3p are: sequence A 146446307 (chromosome 18) 1435 (3'UTR) and sequence B 46446291 (chromosome 18) 1451(3'UTR)

## Appendix Legends

### **Appendix Table S1: PPAR $\beta/\delta$ regulates the expression of miRNAs in murine skin chronically exposed to UV**

Cutaneous miRNA, which expression was affected by chronic UV exposure (12 weeks) in a PPAR $\beta/\delta$ -dependent way. Black: miRNA overexpressed (at least 1.5 fold) in Ppard +/+ compared to Ppard -/- skin. Light grey: miRNA underexpressed (at least 1.5 fold) in Ppard +/+ compared to Ppard -/- skin. Dark grey: miRNA underexpressed (at least 3 fold) in Ppard +/+ compared to Ppard -/- skin. Statistical significance was set to p-value < 0.001 (t-test analysis adjusted for multiple comparison).

### **Appendix Table S2: Identification of putative targets of miR-21-3p**

Putative targets of miR-21-3p were identified by in silico analysis of miRNA Recognition Elements using the miRmap interface (Vejnar et al, 2013). miTG score: weighted sum of the scores of the miRNA Recognition Elements identified on the same 3'UTR. Putative targets with a miTG score of 0.7 or above are listed.

**Appendix Figure S1: (A)** miR-21-3p/miR-21-5p ratio: number of miR-21-3p reads on the number of miR-21-5p reads obtained from RNA sequencing in mouse brain, heart, kidney,

testis and total skin. **(B)** Normalized miR-21-3p counts from RNA sequencing in acutely irradiated (Ac-UV; +) and non-irradiated (-) epidermis and dermis of Ppard +/+ and -/- mice. miR-21-3p: Epidermis no UV vs Ac-UV P = 0.043, N=4 animals per group. **(C)** RT-qPCR quantification of Collagen IV (Col4a1, dermis), Involucrin (Ivl, supra-basal epidermis), and Keratin 5 (Krt5, basal epidermis) mRNA in mouse isolated dermis and epidermis, N=3 animals per group Ivl: Dermis vs Epidermis P = 0.046; Krt 5: Dermis vs Epidermis P = 2E-04. **(D)** RT-qPCR quantification of relative Ppard mRNA expression in epidermis and dermis of Ppard +/+ and -/- mice, acutely UV-irradiated (Ac-UV; +) or non-irradiated (-). Ppard: Epidermis no UV vs Ac-UV P = 0.007. N=4 animals per group. **(E)** RT-qPCR quantification of ANGPTL4 and TGFB1 mRNA expression in HaCaT cells treated with the PPAR $\beta/\delta$  agonist GW501516 or vehicle. ANGPTL4: Veh vs GW501516 P = 8E-04; TGFB1: Veh vs GW501516 P = 0.017 N=3 biological replicates. **(F)** RT-qPCR quantification of relative SERPINE1 levels in HaCaT cells treated for 24h with 2 or 5ng/ml of recombinant human TGF $\beta$ -1 or vehicle. SERPINE1: TGF $\beta$ -1 Veh vs 5ng/ml P = 0.001. N=3 biological replicates. **(G)** RT-qPCR quantification of relative ANGPTL4 and SERPINE1 expression in HaCat cells treated during 24h with the PPAR $\beta/\delta$  agonist GW0742 and/or the TGF $\beta$  receptor inhibitor SB431542 or vehicle as indicated. ANGPTL4: Veh vs GW0742 P = 6E-08, GW0742 vs SB431542 P = 0.002; SB431542 vs GW0742/SB431542 P = 0.033; SERPINE1: Veh vs GW0742 P = 0.039, GW0742 vs SB431542 P = 0.001, N=3 biological replicates. **(H)** RT-qPCR quantification of relative Serpine1 expression in Ppard +/+ epidermis of acutely UV-irradiated (Ac-UV; +) or in non-irradiated (-) mice treated with the TGF $\beta$  receptor inhibitor SB431542 or vehicle. Serpine1: no UV vs Ac-UV P = 1E-04, Ac-UV vs Ac-UV/SB431542 P = 7E-04, N=4 animals per group.

**Appendix Figure S2:** **(A)** RT-qPCR quantification of relative miR-21-3p and miR-21-5p levels in HaCaT cells transfected with a miR-21-3p mimic or a scrambled sequence (control). miR-21-3p: control vs miR-21-3p mimic P = 1E-04, N=3 biological replicates. **(B)** RT-qPCR quantification of relative miR-21-3p levels in normal mouse skin, DMBA/TPA-induced

papilloma and squamous cell carcinomas (SCC). miR-21-3p: Normal mouse skin vs Mouse skin papilloma  $P = 0.028$ , Normal mouse skin vs Mouse skin SCC  $P = 0.008$ ,  $N=6$  animals per group. **(C)** RT-qPCR quantification of relative miR-21-5p and miR-21-3p levels in normal mouse skin (control) or after gentle epidermal barrier disruption (Tape Stripping) **(D)** Fluorescent miR-21-3p or scrambled control *in situ* hybridization (pink) in healthy human skin. E: epidermis; D: dermis. Magnification bar:  $20\mu\text{m}$  **(E)** RT-qPCR quantification of relative mRNA expression of PPARD and TGFB1 in healthy human skin and in human squamous cell carcinomas (SCC). PPARD: Healthy skin vs SCC  $P = 0.034$ ; TGFB1: Healthy skin vs SCC  $P = 0.012$ .  $\geq 5$  independent biopsies per condition. **(F)** RT-qPCR quantification of relative mRNA expression of PPARD and TGFB1 in healthy human skin and in human psoriasis lesions. PPARD: Healthy skin vs psoriasis lesions  $P = 0.032$ ; TGFB1: Healthy skin vs psoriasis lesions  $P = 0.021$ .  $\geq 4$  independent biopsies per condition **(G)** RT-qPCR quantification of miR-21-3p (Left panel) and TGFB1 (Right panel) in abdominal healthy human skin biopsies exposed to acute UV *ex vivo*, with or without topical treatment with miR-21-3p inhibitor (+) or mismatched control (-) as indicated. miR-21-3p: no UV vs Ac-UV  $P = 0.027$ , Ac-UV vs Ac-UV/miR-21-3p inhibitor  $P = 0.010$ .  $\geq 7$  biological replicates, a pool of three independent experiment performed with the skin of three different donors is shown.

|                |   |   |        |
|----------------|---|---|--------|
| miR-93-3p(*)   | ■ |   |        |
| miR-34c-5p     | ■ |   |        |
| miR-337-3p     | ■ |   |        |
| miR-154-5p     | ■ |   |        |
| miR-21-3p(*)   | ■ |   |        |
| miR-379-5p     | ■ |   |        |
| miR-299a-5p(*) | ■ |   |        |
| miR-300-3p     | ■ |   |        |
| miR-329-3p     | ■ | ■ | > 1.5  |
| miR-127-3p     | ■ | ■ | < -1.5 |
| miR-434-5p     | ■ | ■ | -3     |
| miR-667-3p     | ■ | ■ |        |

| Ppard +/+ versus -/-<br>Fold change<br>(p-value < 0.001 ) |        |
|-----------------------------------------------------------|--------|
| ■                                                         | > 1.5  |
| ■                                                         | < -1.5 |
| ■                                                         | -3     |

Appendix Table S1

PPAR $\beta/\delta$  regulates the expression of miRNAs in murine skin chronically exposed to UV.

Appendix Table S2

## miR-21-3p in silico predicted targets

| Ensembl ID      | Gene Id (name)             | miTG score | Biological process                                                                                                                               |
|-----------------|----------------------------|------------|--------------------------------------------------------------------------------------------------------------------------------------------------|
| ENST00000253807 | ENSG00000081842 (PCDHA6)   | 0.974      | cell adhesion_homophilic cell adhesion via plasma membrane adhesion molecules                                                                    |
| ENST00000231004 | ENSG00000113083 (LOX)      | 0.959      | blood circulation_cell adhesion_inflammatory response                                                                                            |
| ENST00000257905 | ENSG00000135447 (PPP1R1A)  | 0.958      | glycogen metabolic process_intracellular signal transduction_negative regulation of protein kinase activity                                      |
| ENST00000261349 | ENSG00000070018 (LRP6)     | 0.95       | canonical Wnt signaling pathway_cerebral cortex development_face morphogenesis                                                                   |
| ENST00000240364 | ENSG00000121104 (FAM117A)  | 0.94       | na                                                                                                                                               |
| ENST00000220822 | ENSG00000104381 (GDAP1)    | 0.929      | glutathione metabolic process                                                                                                                    |
| ENST00000194672 | ENSG00000082269 (FAM135A)  | 0.923      | activation of MAPK activity                                                                                                                      |
| ENST00000229330 | ENSG00000111727 (HCFC2)    | 0.921      | negative regulation of transcription from RNA polymerase II promoter_viral process                                                               |
| ENST00000257192 | ENSG00000134760 (DSG1)     | 0.905      | apoptotic process_cell-cell junction assembly                                                                                                    |
| ENST00000229769 | ENSG00000112039 (FANCE)    | 0.905      | DNA damage_DNA repair                                                                                                                            |
| ENST00000238831 | ENSG00000119820 (YIPF4)    | 0.872      | maintenance of the Golgi structure                                                                                                               |
| ENST00000263239 | ENSG00000088205 (DDX18)    | 0.862      | RNA secondary structure unwinding                                                                                                                |
| ENST00000261427 | ENSG00000078140 (UBE2K)    | 0.857      | cellular response to interferon-beta_proteasome-mediated ubiquitin-dependent protein catabolic process                                           |
| ENST00000260777 | ENSG00000187164 (KIAA1598) | 0.856      | actin filament bundle retrograde transport_axon guidance_                                                                                        |
| ENST00000256509 | ENSG00000134121 (CHL1)     | 0.84       | cellular protein metabolic process_endoplasmic reticulum unfolded protein response_IRE1-mediated unfolded protein response                       |
| ENST00000246229 | ENSG00000126003 (PLAGL2)   | 0.84       | chylomicron assembly_lipid metabolic process_positive regulation of intrinsic apoptotic signaling pathway                                        |
| ENST00000250263 | ENSG00000104626 (ERI1)     | 0.829      | DNA catabolic process, exonucleolytic                                                                                                            |
| ENST00000239367 | ENSG00000120256 (LRP11)    | 0.824      | multicellular organismal response to stress                                                                                                      |
| ENST00000218099 | ENSG00000101981 (F9)       | 0.822      | blood coagulation_Hemostasis                                                                                                                     |
| ENST00000240055 | ENSG00000120837 (NFYB)     | 0.82       | positive regulation of transcription, DNA-templated                                                                                              |
| ENST00000262052 | ENSG00000110911 (SLC11A2)  | 0.815      | cation transmembrane transport                                                                                                                   |
| ENST00000262124 | ENSG00000085415 (SEHL1)    | 0.811      | cell division_cytokine production involved in inflammatory response                                                                              |
| ENST00000244745 | ENSG00000124766 (SOX4)     | 0.805      | ascending aorta morphogenesis_canonical Wnt signaling pathway_cellular response to glucose stimulus_DNA damage response, detection of DNA damage |
| ENST00000256682 | ENSG00000134287 (ARF3)     | 0.804      | phosphatidylinositol biosynthetic process_phospholipid metabolic process_protein transport                                                       |
| ENST00000251108 | ENSG00000102543 (CDADC1)   | 0.801      | na                                                                                                                                               |
| ENST00000261226 | ENSG00000057704 (TMCC3)    | 0.797      | na                                                                                                                                               |
| ENST00000238616 | ENSG00000119638 (NEK9)     | 0.786      | cell division                                                                                                                                    |
| ENST00000255416 | ENSG00000133055 (MYBPH)    | 0.777      | cell adhesion                                                                                                                                    |
| ENST00000252512 | ENSG00000130227 (XPO7)     | 0.77       | mRNA transport                                                                                                                                   |
| ENST00000235382 | ENSG00000116741 (RGS2)     | 0.766      | brown fat cell differentiation_cell cycle_negative regulation of cAMP-mediated signaling                                                         |
| ENST00000227451 | ENSG00000110042 (DTX4)     | 0.766      | Notch signaling pathway_protein ubiquitination                                                                                                   |
| ENST00000250448 | ENSG00000129514 (FOXA1)    | 0.763      | anatomical structure morphogenesis_cell differentiation                                                                                          |
| ENST00000251020 | ENSG00000103449 (SALL1)    | 0.762      | adrenal gland development_branching involved in ureteric bud morphogenesis_embryonic digestive tract development                                 |
| ENST00000216416 | ENSG00000100528 (CNIH)     | 0.751      | immune response                                                                                                                                  |

|                 |                             |       |                                                                                                                                               |
|-----------------|-----------------------------|-------|-----------------------------------------------------------------------------------------------------------------------------------------------|
| ENST00000262460 | ENSG00000101003 (GINS1)     | 0.748 | DNA strand elongation involved in DNA replication                                                                                             |
| ENST00000249064 | ENSG00000159873 (CCDC117)   | 0.748 | na                                                                                                                                            |
| ENST00000262158 | ENSG00000101665 (SMAD7)     | 0.747 | BMP signaling pathway_intracellular signal transduction_negative regulation of transforming growth factor beta receptor signaling pathway     |
| ENST00000256649 | ENSG00000134253 (TRIM45)    | 0.747 | bone development                                                                                                                              |
| ENST00000261530 | ENSG00000089916 (C14orf118) | 0.735 | na                                                                                                                                            |
| ENST00000233969 | ENSG00000115616 (SLC9A2)    | 0.734 | ion transport_protein localization                                                                                                            |
| ENST00000242208 | ENSG00000122641 (INHBA)     | 0.732 | activin receptor signaling pathway_cell cycle arrest_hair follicle development                                                                |
| ENST00000249377 | ENSG00000128606 (LRRC17)    | 0.732 | bone marrow development                                                                                                                       |
| ENST00000237853 | ENSG00000118985 (ELL2)      | 0.731 | regulation of transcription, DNA-templated                                                                                                    |
| ENST00000262367 | ENSG00000005339 (CREBBP)    | 0.73  | cell proliferation_cellular lipid metabolic process_innate immune response                                                                    |
| ENST00000261211 | ENSG00000059758 (CDK17)     | 0.729 | protein phosphorylation                                                                                                                       |
| ENST00000215832 | ENSG00000100030 (MAPK1)     | 0.724 | na                                                                                                                                            |
| ENST00000263026 | ENSG00000103319 (EEF2K)     | 0.723 | insulin receptor signaling pathway_regulation of protein autophosphorylation                                                                  |
| ENST00000242505 | ENSG00000138286 (FAM149B1)  | 0.72  | na                                                                                                                                            |
| ENST00000255380 | ENSG00000133019 (CHRM3)     | 0.719 | adenylate cyclase-inhibiting G-protein coupled acetylcholine receptor signaling pathway_cell proliferation_energy reserve metabolic process   |
| ENST00000258646 | ENSG00000136144 (RCBTB1)    | 0.716 | cell cycle_chromatin modification_regulation of transcription                                                                                 |
| ENST00000005257 | ENSG00000006451 (RALA)      | 0.714 | actin cytoskeleton reorganization_chemotaxis                                                                                                  |
| ENST00000216252 | ENSG00000100410 (PHF5A)     | 0.714 | mRNA processing                                                                                                                               |
| ENST00000258198 | ENSG00000135720 (DYNC1LI2)  | 0.709 | antigen processing and presentation of exogenous peptide antigen via MHC class II_centrosome localization_microtubule-based movement          |
| ENST00000257696 | ENSG00000135245 (HILPDA)    | 0.709 | autocrine signaling_positive regulation of cell proliferation_positive regulation of cytokine production_positive regulation of lipid storage |
| ENST00000261537 | ENSG00000101752 (MIB1)      | 0.707 | blood vessel development_endocytosis_Notch signaling pathway                                                                                  |
| ENST00000238647 | ENSG00000119669 (IRF2BP1)   | 0.704 | development of secondary female sexual characteristics_negative regulation of transcription from RNA polymerase II promoter                   |
| ENST00000066544 | ENSG00000004897 (CDC27)     | 0.703 | anaphase-promoting complex-dependent proteasomal ubiquitin-dependent protein catabolic process_cell proliferation                             |
| ENST00000248450 | ENSG00000127837 (AAMP)      | 0.702 | angiogenesis                                                                                                                                  |
| ENST00000223951 | ENSG00000107105 (ELAVL2)    | 0.702 | regulation of transcription_DNA-templated                                                                                                     |
| ENST00000263681 | ENSG00000077514 (POLD3)     | 0.7   | DNA damage response, detection of DNA damage                                                                                                  |

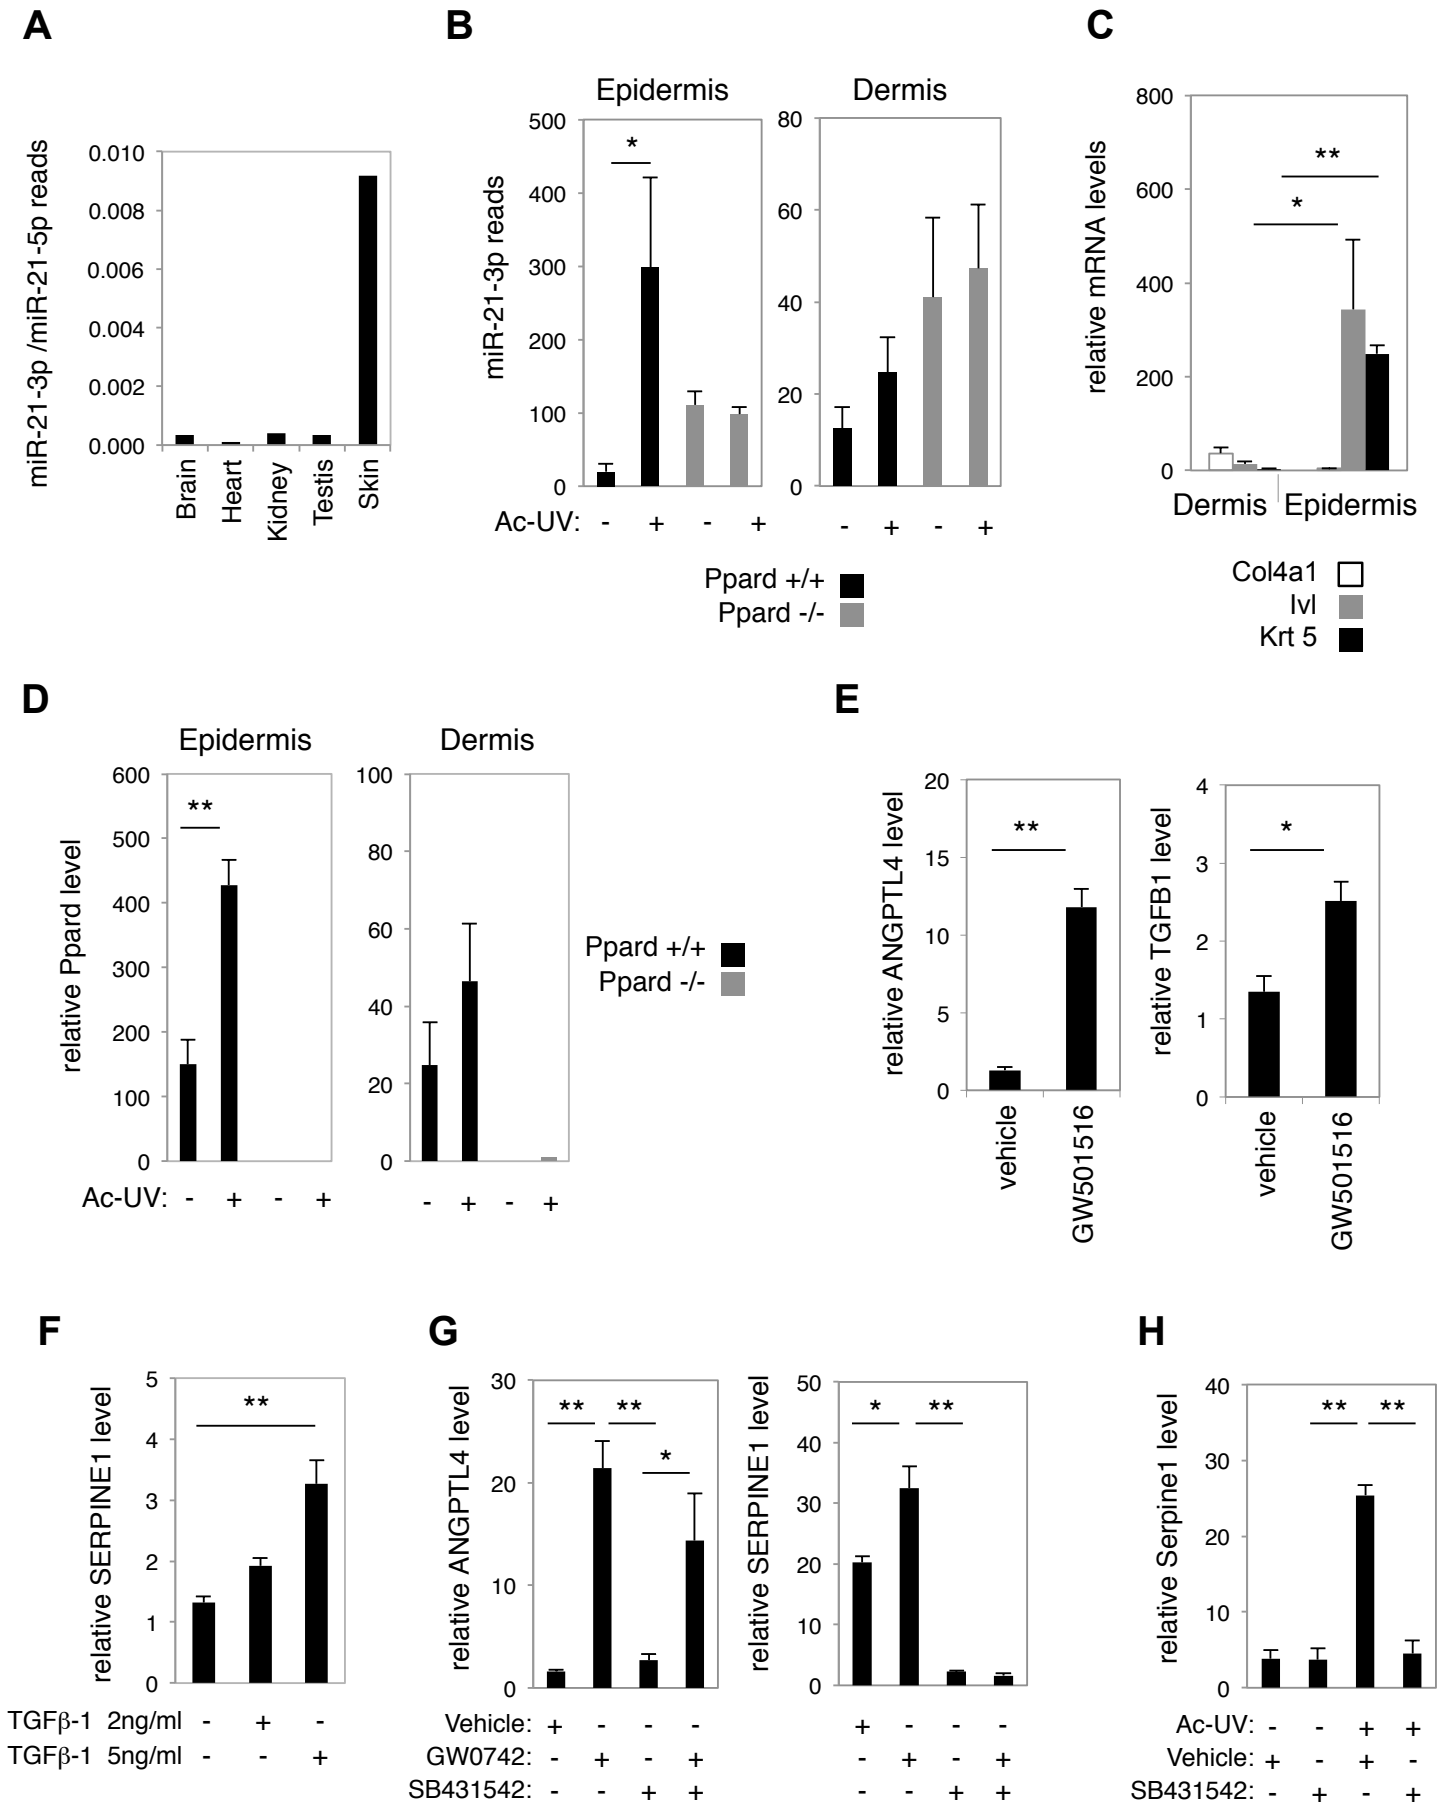

Appendix Figure S1



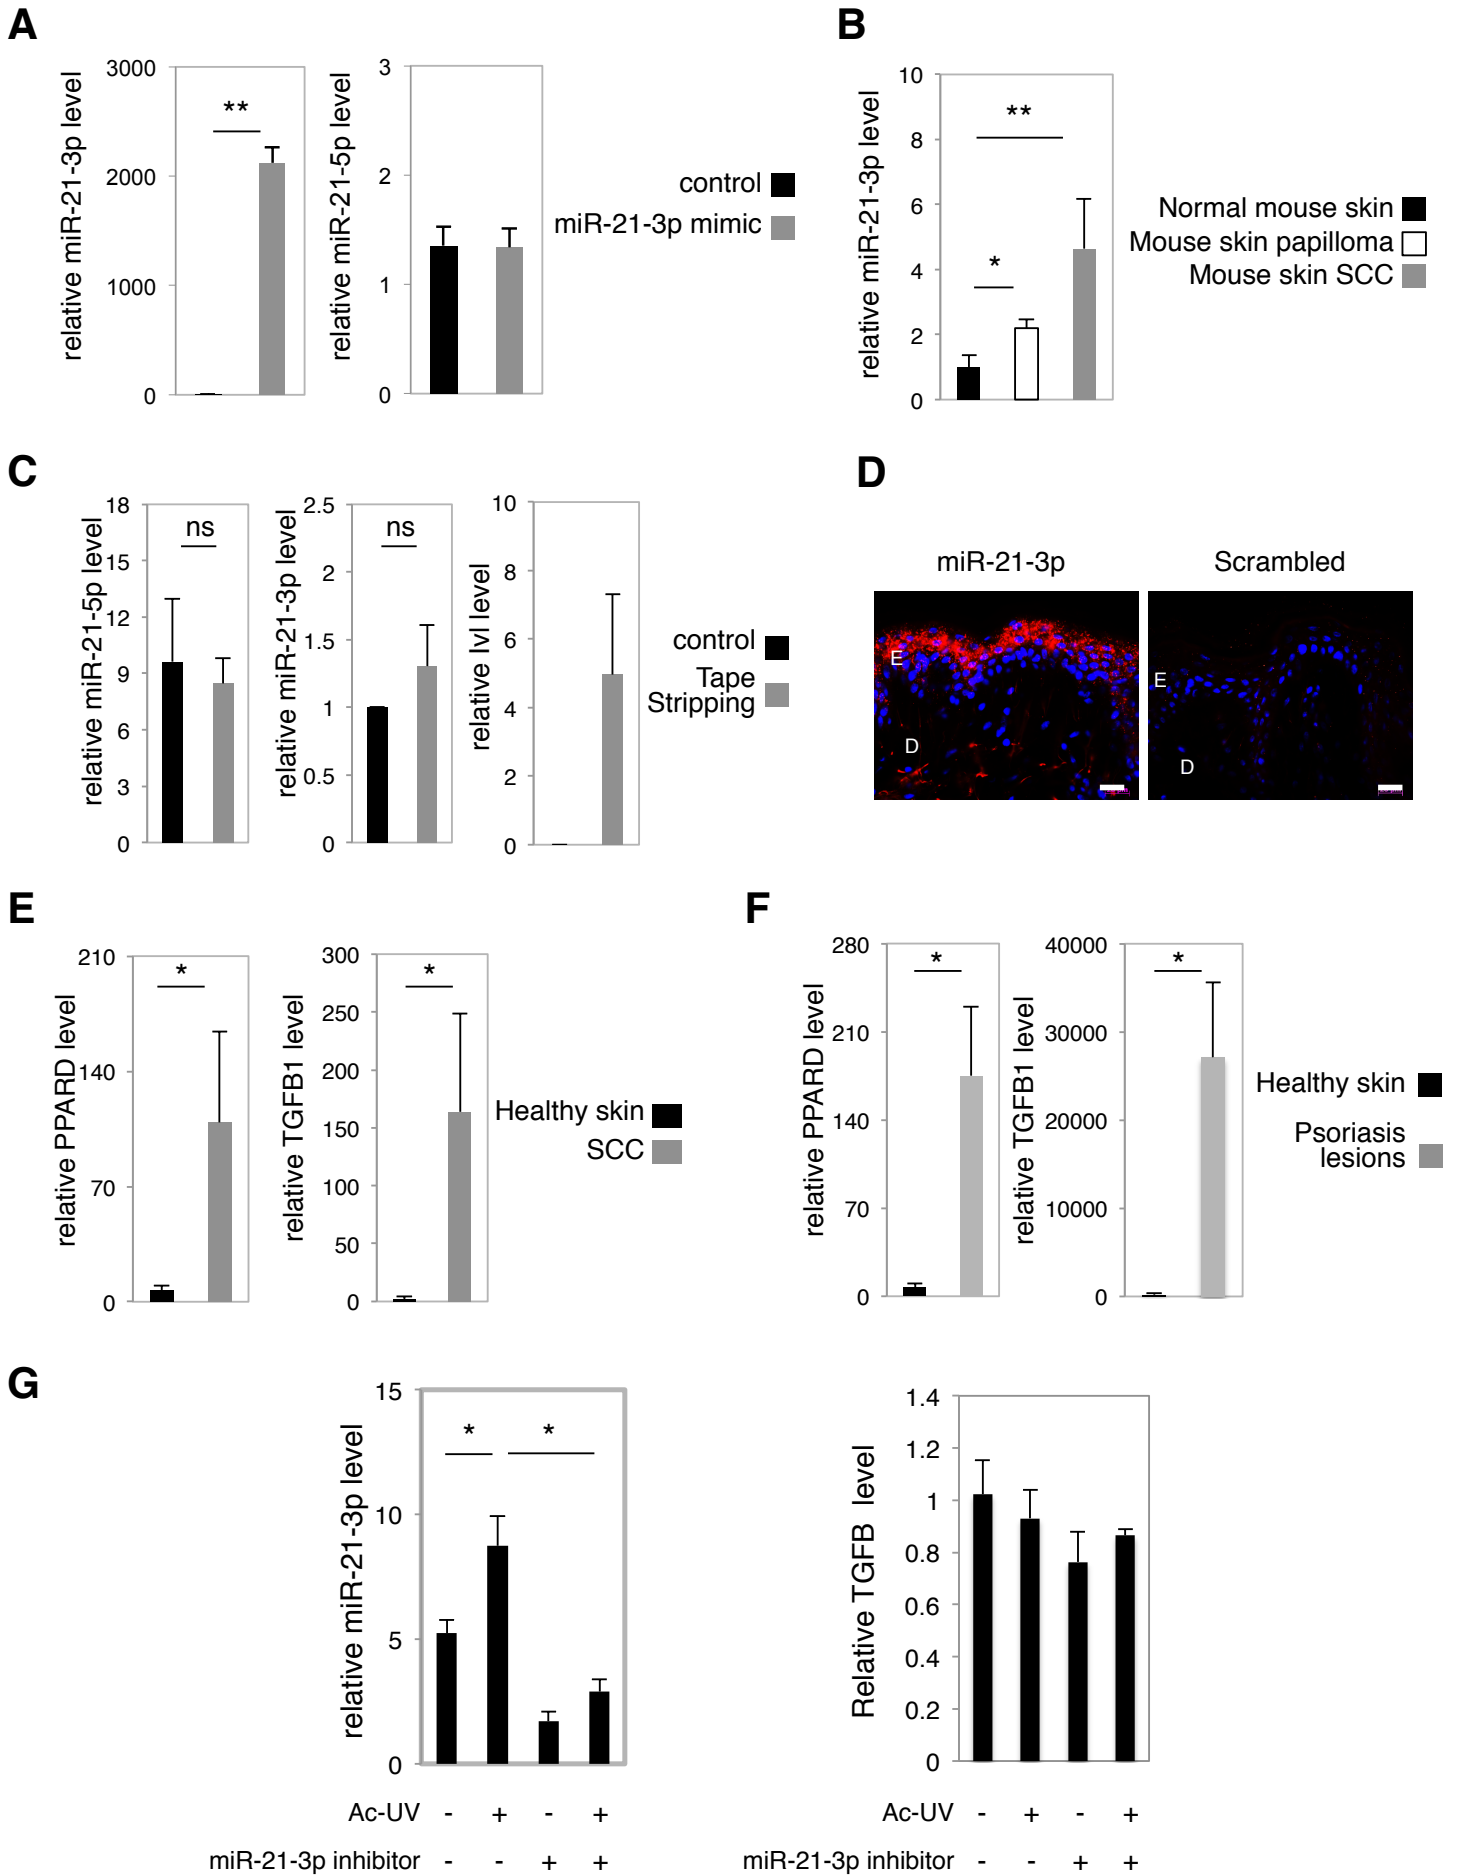

Appendix Figure S2
